# Supplementary material for: Association of the Yips and Musculoskeletal Problems in Highly Skilled Golfers: A Large Scale Epidemiological Study in Japan
Source: MDPI journal article supplement (doi:10.3390/sports9060071), 2021-05-21
Supplement: s1 [file s1]

*Supplementary Materials*

# Association of the Yips and Musculoskeletal Problems in Highly Skilled Golfers: A Large Scale Epidemiological Study in Japan

Yasufumi Gon <sup>1,\*</sup>, Daijiro Kabata <sup>2</sup>, Sadahito Kawamura <sup>3,4</sup>, Masahito Mihara <sup>5</sup>, Ayumi Shintani <sup>2</sup>, Ken Nakata <sup>3</sup> and Hideki Mochizuki <sup>1</sup>

<sup>1</sup> Department of Neurology, Graduate School of Medicine, Osaka University, 2-2 Yamada-oka, Suita, Osaka 565-0871, Japan; hmochizuki@neuro.med.osaka-u.ac.jp

<sup>2</sup> Department of Medical Statistics, Graduate School of Medicine, Osaka City University, 1-4-3 Asahi-machi, Osaka Abeno-ku, Osaka 545-8586, Japan; kabata.daijiro@med.osaka-cu.ac.jp (D.K.); ayumi.shintani@gmail.com (A.S.)

<sup>3</sup> Department of Medicine for Sports and Performing Arts, Graduate School of Medicine, Osaka University, 2-2 Yamada-oka, Suita, Osaka 565-0871, Japan; kawamura@bc.ij4u.or.jp (S.K.); ken.nakata7@gmail.com (K.N.)

<sup>4</sup> Kawamura Orthopedic Clinic, 1-10-30 Misaki, Osaka minato-ku, Osaka 552-0016, Japan

<sup>5</sup> Department of Neurology, Kawasaki Medical University, 557 Matsushima, Kurashiki, Okayama 701-0192, Japan; mihara@med.kawasaki-m.ac.jp

\* Correspondence: gon@neuro.med.osaka-u.ac.jp; tel.: +81-6-6879-3571

**Citation:** Gon, Y.; Kabata, D.; Kawamura, S.; Mihara, M.; Shintani, A.; Nakata, K.; Mochizuki, H. Association of the Yips and Musculoskeletal Problems in Highly Skilled Golfers: A Large Scale Epidemiological Study in Japan. *Sports* **2021**, *9*, 71. <https://doi.org/10.3390/sports9060071>

Academic Editor: Silvio Lorenzetti

Received: 26 March 2021

Accepted: 18 May 2021

Published: 21 May 2021

**Abstract:** The yips are a set of conditions associated with intermittent motor disturbances that affect precision movement, especially in sports. Specifically, skilled golfers suffer from the yips, although its clinical characteristics and pathophysiology have not been well-studied. We survey skilled golfers to characterize their yips-related symptoms, to explore potential confounding factors associated with the yips. Golfers' demographic information, golfing-career-related history, musculoskeletal status and manifestations of the yips are surveyed. Among the 1576 questionnaires distributed, 1457 (92%) responses are received, of which 39% of golfers have experienced the yips. The median age and golfing careers are 48 and 28 years, respectively. Golfers who have experienced the yips are older and have had longer golfing careers and more frequent musculoskeletal problems than those without experience of the yips. The multivariate logistic regression analysis reveals that a longer golfing career and musculoskeletal problems are independent factors associated with yips experience. More severe musculoskeletal problems are associated with higher odds of experiencing the yips. A positive association between the yips and musculoskeletal problems is also observed. The yips have similar characteristics to task-specific movement disorders, with a detrimental effect caused by excessive repetition of a routine task. These findings support the notion that the yips are a type of task-specific dystonia.

**Keywords:** yips; golfing career; musculoskeletal symptoms; task-specific dystonia

**Publisher's Note:** MDPI stays neutral with regard to jurisdictional claims in published maps and institutional affiliations.

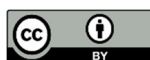

**Copyright:** © 2021 by the authors. Submitted for possible open access publication under the terms and conditions of the Creative Commons Attribution (CC BY) license (<http://creativecommons.org/licenses/by/4.0/>).

**Table S1.** Characteristics of musculoskeletal problems.

| Location              | Musculoskeletal problems, n = 689 | Degree of musculoskeletal symptoms |          |         |                      |
|-----------------------|-----------------------------------|------------------------------------|----------|---------|----------------------|
|                       |                                   | Mild                               | Moderate | Severe  | Unknown <sup>†</sup> |
| Neck                  | 106 (15)                          | 62 (58)                            | 17 (16)  | 23 (22) | 4 (4)                |
| Shoulder or upper arm | 149 (22)                          | 83 (56)                            | 35 (23)  | 25 (17) | 6 (4)                |
| Elbow                 | 113 (16)                          | 70 (62)                            | 23 (20)  | 16 (14) | 4 (4)                |
| Lower arm             | 13 (2)                            | 4 (31)                             | 3 (23)   | 6 (46)  | 0 (0)                |
| Wrist                 | 120 (17)                          | 61 (51)                            | 31 (26)  | 19 (16) | 9 (8)                |
| Upper back            | 53 (8)                            | 28 (53)                            | 12 (23)  | 10 (19) | 3 (6)                |
| Lower back            | 314 (46)                          | 171 (54)                           | 82 (26)  | 47 (15) | 14 (4)               |
| Leg                   | 219 (32)                          | 106 (48)                           | 50 (23)  | 48 (22) | 15 (7)               |
| Unknown <sup>†</sup>  | 57 (8)                            | 41 (72)                            | 14 (25)  | 0 (0)   | 2 (4)                |

All data are shown in counts and percentages. Percentages have been rounded up for simplicity of presentation and may not equal 100% in all cases.

**Table S2.** Clinical manifestation of the yips.

|                                                |          |
|------------------------------------------------|----------|
| Variable                                       |          |
| Affected club                                  |          |
| Putter                                         | 281 (54) |
| Iron                                           | 98 (19)  |
| Driver                                         | 158 (31) |
| Affected stroke                                |          |
| Putting                                        | 279 (54) |
| Approaching                                    | 224 (43) |
| Bunker shot                                    | 40 (8)   |
| Rough shot                                     | 34 (7)   |
| Fairway shot                                   | 72 (14)  |
| Tee shot                                       | 168 (33) |
| Symptoms                                       |          |
| Spasm                                          | 151 (29) |
| Jerk                                           | 117 (23) |
| Tremor                                         | 75 (15)  |
| Strategy for the yips                          |          |
| Increasing training loads                      | 139 (33) |
| Decreasing training loads                      | 53 (10)  |
| Changing training methods and/or hitting style | 327 (63) |
| Others <sup>†</sup>                            | 101 (20) |

All data are shown in counts and percentages. Percentages have been rounded up for simplicity of presentation and may not equal 100% in all cases. <sup>†</sup>Others refer to strategies such as changing of preshot routine and/or thought.

**Table S3.** Factors associated with improvement in the yips (results of interaction analysis).

| Characteristic                  | Odds ratio | 95% confidence interval | p value |
|---------------------------------|------------|-------------------------|---------|
| Amateur and other strategy      | 1.24       | 0.38–4.01               | 0.72    |
| Professional and other strategy | 4.50       | 2.28–8.86               | <0.001  |
| Professional*other strategy     |            |                         | 0.05    |

Only the result of interaction analysis between professional/amateur and other strategy was shown in this table because we found no other significant relationships.
